# Supplementary material
Source: PubMed Central journal article supplement (PMC8728797)
Supplement: NEJMoa2115624_appendix.pdf [file NEJMoa2115624_appendix.pdf]

## Supplementary Appendix

Supplement to: Arbel R, Hammerman A, Sergienko R, et al. BNT162b2 vaccine booster and mortality due to Covid-19. *N Engl J Med*. DOI: 10.1056/NEJMoa2115624

This appendix has been provided by the authors to give readers additional information about the work.

## **Supplementary Material**

### Contents

|                                                                                            |    |
|--------------------------------------------------------------------------------------------|----|
| Data Sources .....                                                                         | 2  |
| Study Oversight .....                                                                      | 3  |
| Figure S1: Study timeline .....                                                            | 4  |
| Figure S2: Transition from non-booster to booster status .....                             | 5  |
| Explanation on the Socio-Economic Status (SES) Measure.....                                | 6  |
| Table S1: Results of Schoenfeld’s Global test for the proportional hazards assumption..... | 7  |
| Table S2: Validation testing of the 7 day effectiveness period by Cox regression .....     | 8  |
| Table S3: Validation testing of the 14 day effectiveness period by Cox regression .....    | 9  |
| Table S4: Results of the Cox regression analysis for subjects 65 and older.....            | 10 |
| Table S5: Results of the Cox regression analysis for subjects younger than 65.....         | 11 |
| Table S6: Results of the Cox regression analysis for females .....                         | 12 |
| Table S7: Results of the Cox regression analysis for males .....                           | 13 |
| Table S8: Results of the Cox regression analysis for infection- all subjects .....         | 14 |
| References.....                                                                            | 15 |

## Data Sources

Data in this study comes from the electronic medical records of Clalit Health Services (CHS). CHS is the largest of four integrated payer-provider health care organizations that provide mandatory health care coverage in Israel. CHS covers approximately 52% of the population of Israel (4.7 million persons). The dropout rate from CHS is 1- 2% yearly (1).

CHS pools the data from its many operational systems into a unified central data warehouse used for policy and research. This data repository includes detailed primary and secondary care information on hospitalizations, medications, laboratory results, and imaging tests. Due to the early adoption of electronic medical records and the low yearly dropout rate, CHS has good long-term follow-up of patients, ranging from the year 2000 (2).

Since the COVID-19 pandemic, the Israeli Ministry of Health (MOH) has centrally collected all COVID-19 related data. These include complete data on PCR testing, vaccination status, hospitalizations, and COVID-19 related deaths, as reported daily to the MOH by all Israeli hospitals. The MOH transfers this data day-to-day to the Israeli health funds (3). This allows integration of background medical information with vaccination status and COVID-19 related outcomes for the entire CHS patient population. The integrated data was used to generate the dataset for this study.

## Study Oversight

All the authors participated in the study design. Dr. Yaron oversaw the data gathering; Ruslan Sergeinko analyzed the data with the guidance of Prof. Friger. All authors vouch for the data and analysis. Dr. Arbel wrote the initial manuscript. All authors contributed to the writing and critical review of the manuscript and decided to submit it for publication. The study was approved by the CHS Community Helsinki committee and the CHS data utilization committee.

Figure S1: Study timeline

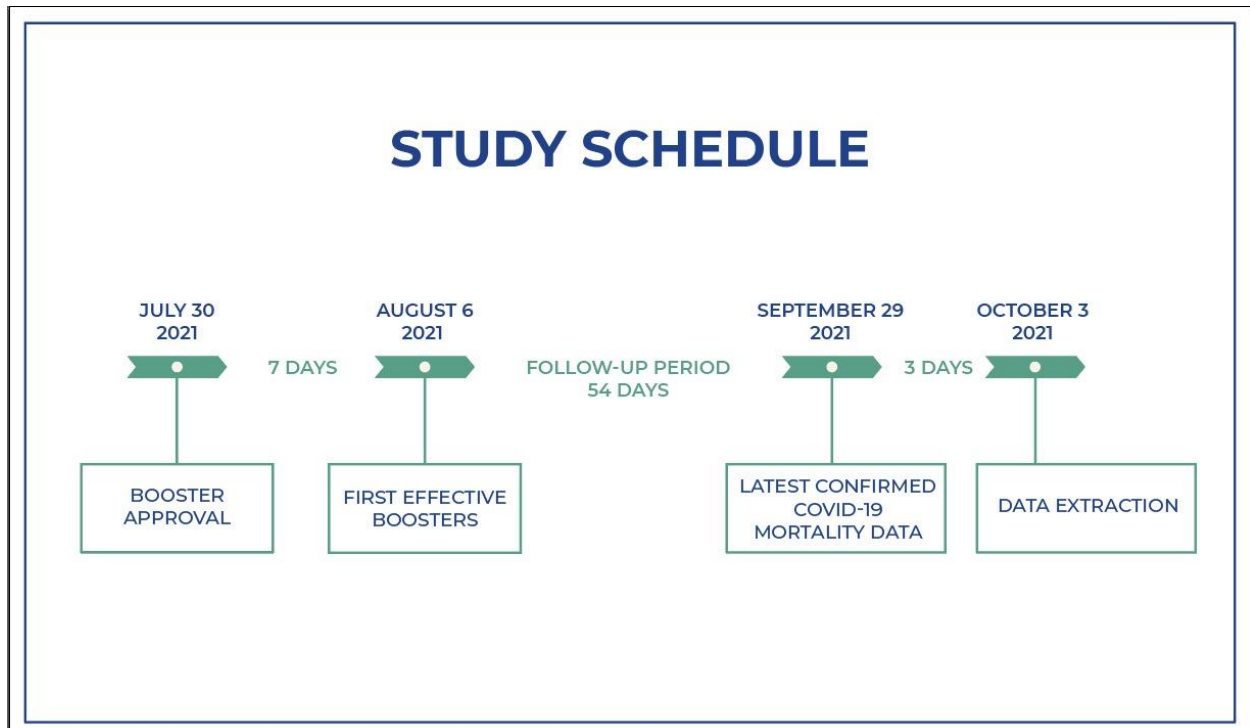

Figure S2: Transition from non-booster to booster status

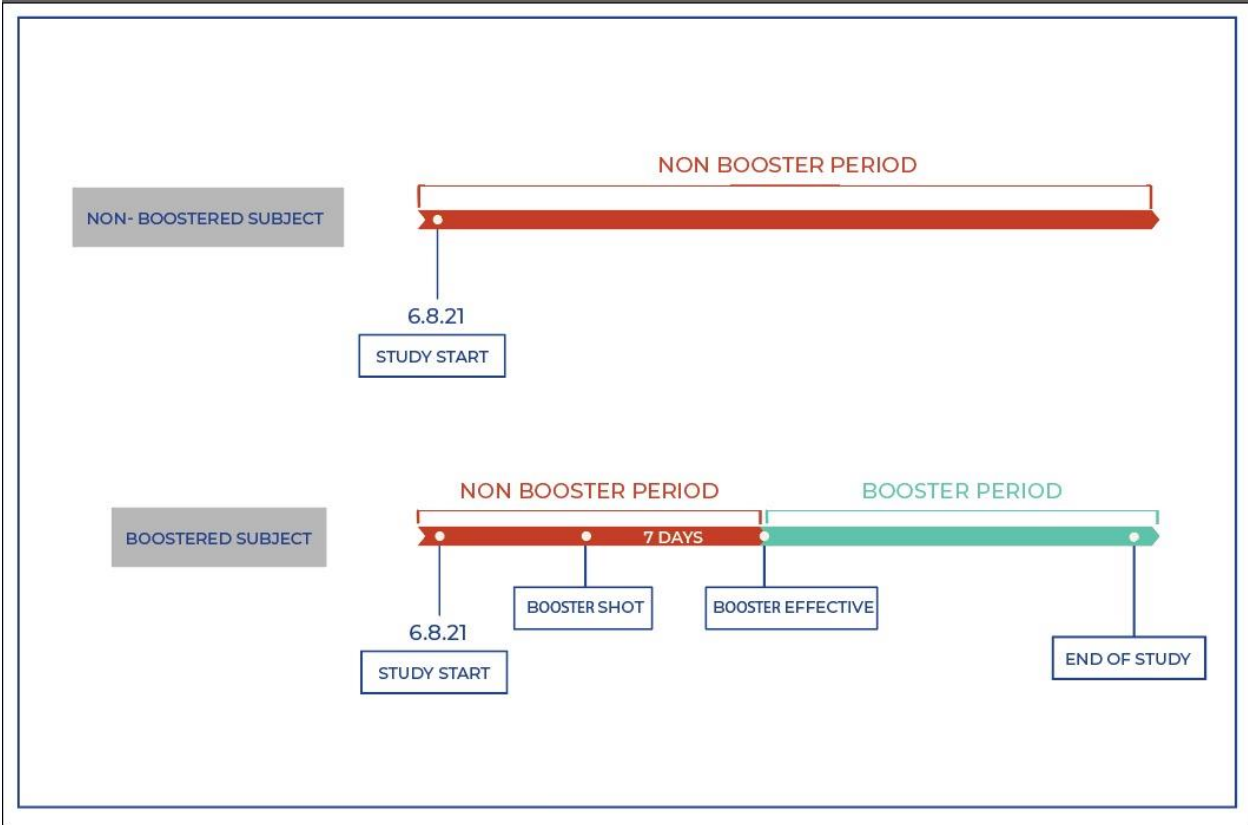

## Explanation on the Socio-Economic Status (SES) Measure

SES was based on the small statistical areas (SSA) used in the 2008 Israeli census. SSAs contain 3000–4000 people and are created to maintain homogeneity in terms of the sociodemographic composition of the population (4). The Israeli Central Bureau of Statistics (CBS) utilized demography, education, employment, housing conditions, and income to define the SSAs, and these were grouped into 20 categories. This data was updated by the POINTS Location Intelligence Company (5) to improve the accuracy of the SES measure, using up-to-date sociodemographic, commercial, and housing data (6). The entire CHS population was grouped into ten categories, ranging from 1 (lowest) to 10 (highest).

Table S1: Results of Schoenfeld's Global test for the proportional hazards assumption.

|                             | chisq    | df | p     |
|-----------------------------|----------|----|-------|
| Effective Vaccination Group | 2.12678  | 1  | 0.145 |
| Sex (male)                  | 1.43970  | 1  | 0.230 |
| age                         | 0.51585  | 1  | 0.473 |
| Socio-economic status       | 1.54119  | 1  | 0.214 |
| DM                          | 2.77995  | 1  | 0.095 |
| COPD                        | 0.00908  | 1  | 0.924 |
| CVA                         | 0.15241  | 1  | 0.696 |
| CRF                         | 0.00904  | 1  | 0.924 |
| IHD                         | 1.24592  | 1  | 0.264 |
| CHF                         | 2.25373  | 1  | 0.133 |
| obesity                     | 0.31515  | 1  | 0.575 |
| Smoking history             | 0.03695  | 1  | 0.848 |
| Lung cancer                 | 1.60740  | 1  | 0.205 |
| TIA                         | 0.00113  | 1  | 0.973 |
| GLOBAL                      | 14.83077 | 14 | 0.390 |



Table S2: Validation testing of the 7 day effectiveness period by Cox regression

|                       | Sig.         | Exp(B)       | 95.0% CI for Exp(B) |              |
|-----------------------|--------------|--------------|---------------------|--------------|
|                       |              |              | Lower               | Upper        |
| <b>Booster group</b>  | <b>0.318</b> | <b>0.949</b> | <b>0.856</b>        | <b>1.052</b> |
| Sex (male)            | 0.000        | 2.605        | 1.901               | 3.569        |
| age                   | 0.000        | 1.103        | 1.089               | 1.118        |
| Socio-economic status | 0.779        | 1.009        | 0.945               | 1.078        |
| DM                    | 0.080        | 1.297        | 0.969               | 1.735        |
| COPD                  | 0.270        | 1.268        | 0.832               | 1.933        |
| CVA                   | 0.028        | 1.474        | 1.042               | 2.086        |
| CRF                   | 0.000        | 2.241        | 1.612               | 3.116        |
| IHD                   | 0.901        | 0.980        | 0.709               | 1.353        |
| CHF                   | 0.113        | 1.372        | 0.928               | 2.027        |
| obesity               | 0.266        | 1.182        | 0.880               | 1.587        |
| Smoking history       | 0.476        | 1.117        | 0.825               | 1.512        |
| Lung cancer           | 0.003        | 3.215        | 1.497               | 6.906        |
| TIA                   | 0.637        | 0.876        | 0.506               | 1.516        |

Table S3: Validation testing of the 14 day effectiveness period by Cox regression

|                       | Sig.         | Exp(B)       | 95.0% CI for Exp(B) |              |
|-----------------------|--------------|--------------|---------------------|--------------|
|                       |              |              | Lower               | Upper        |
| <b>Booster group</b>  | <b>0.000</b> | <b>0.665</b> | <b>0.600</b>        | <b>0.736</b> |
| Sex (male)            | 0.000        | 2.610        | 1.904               | 3.576        |
| age                   | 0.000        | 1.103        | 1.089               | 1.118        |
| Socio-economic status | 0.692        | 1.013        | 0.949               | 1.082        |
| DM                    | 0.078        | 1.299        | 0.971               | 1.737        |
| COPD                  | 0.276        | 1.264        | 0.829               | 1.926        |
| CVA                   | 0.030        | 1.467        | 1.037               | 2.076        |
| CRF                   | 0.000        | 2.237        | 1.608               | 3.110        |
| IHD                   | 0.903        | 0.980        | 0.710               | 1.354        |
| CHF                   | 0.113        | 1.371        | 0.928               | 2.026        |
| obesity               | 0.267        | 1.182        | 0.880               | 1.587        |
| Smoking history       | 0.466        | 1.119        | 0.827               | 1.516        |
| Lung cancer           | 0.003        | 3.238        | 1.508               | 6.955        |
| TIA                   | 0.639        | 0.877        | 0.507               | 1.518        |

Table S4: Results of the Cox regression analysis for subjects 65 and older

|                       | Sig.         | Exp(B)      | 95.0% CI for Exp(B) |             |
|-----------------------|--------------|-------------|---------------------|-------------|
|                       |              |             | Lower               | Upper       |
| <b>Booster group</b>  | <b>0.000</b> | <b>0.09</b> | <b>0.07</b>         | <b>0.13</b> |
| Sex (male)            | 0.000        | 2.61        | 1.87                | 3.64        |
| age                   | 0.000        | 1.10        | 1.08                | 1.11        |
| Socio-economic status | 0.771        | 0.99        | 0.92                | 1.06        |
| DM                    | 0.419        | 1.13        | 0.84                | 1.54        |
| COPD                  | 0.124        | 1.40        | 0.91                | 2.14        |
| CVA                   | 0.021        | 1.52        | 1.06                | 2.17        |
| CRF                   | 0.000        | 2.14        | 1.52                | 3.00        |
| IHD                   | 0.596        | 0.91        | 0.65                | 1.28        |
| CHF                   | 0.112        | 1.39        | 0.93                | 2.08        |
| obesity               | 0.435        | 1.13        | 0.83                | 1.54        |
| Smoking history       | 0.471        | 1.12        | 0.82                | 1.55        |
| Lung cancer           | 0.003        | 3.23        | 1.50                | 6.96        |
| TIA                   | 0.431        | 0.79        | 0.44                | 1.42        |

Table S5: Results of the Cox regression analysis for subjects younger than 65

|                       | Sig.         | Exp(B)      | 95.0% CI for Exp(B) |             |
|-----------------------|--------------|-------------|---------------------|-------------|
|                       |              |             | Lower               | Upper       |
| <b>Booster group</b>  | <b>0.000</b> | <b>0.13</b> | <b>0.04</b>         | <b>0.40</b> |
| Sex (male)            | 0.417        | 1.53        | 0.55                | 4.22        |
| age                   | 0.011        | 1.19        | 1.04                | 1.37        |
| Socio-economic status | 0.292        | 0.90        | 0.73                | 1.10        |
| DM                    | 0.025        | 3.31        | 1.16                | 9.45        |
| COPD                  | 0.978        | 0.00        | -                   |             |
| CVA                   | 0.570        | 1.51        | 0.36                | 6.34        |
| CRF                   | 0.001        | 6.74        | 2.09                | 21.77       |
| IHD                   | 0.526        | 1.48        | 0.44                | 4.99        |
| CHF                   | 0.285        | 2.25        | 0.51                | 10.00       |
| obesity               | 0.618        | 1.28        | 0.49                | 3.35        |
| Smoking history       | 0.613        | 0.78        | 0.29                | 2.06        |
| Lung cancer           | 0.993        | 0.00        | -                   |             |
| TIA                   | 0.245        | 2.67        | 0.51                | 13.92       |

Table S6: Results of the Cox regression analysis for females

|                       | Sig.         | Exp(B)      | 95.0% CI for Exp(B) |             |
|-----------------------|--------------|-------------|---------------------|-------------|
|                       |              |             | Lower               | Upper       |
| <b>Booster group</b>  | <b>0.000</b> | <b>0.06</b> | <b>0.03</b>         | <b>0.11</b> |
| age                   | 0.000        | 1.11        | 1.08                | 1.13        |
| Socio-economic status | 0.791        | 0.98        | 0.88                | 1.10        |
| DM                    | 0.051        | 1.65        | 1.00                | 2.73        |
| COPD                  | 0.745        | 1.16        | 0.48                | 2.78        |
| CVA                   | 0.241        | 1.46        | 0.77                | 2.77        |
| CRF                   | 0.954        | 1.02        | 0.49                | 2.15        |
| IHD                   | 0.791        | 1.08        | 0.60                | 1.96        |
| CHF                   | 0.057        | 1.94        | 0.98                | 3.82        |
| obesity               | 0.540        | 1.17        | 0.71                | 1.94        |
| Smoking history       | 0.777        | 1.09        | 0.61                | 1.93        |
| Lung cancer           | 0.531        | 1.89        | 0.26                | 13.71       |
| TIA                   | 0.361        | 0.57        | 0.18                | 1.88        |

Table S7: Results of the Cox regression analysis for males

|                       | <u>Sig.</u>  | <u>Exp(B)</u> | <u>95.0% CI for Exp(B)</u> |              |
|-----------------------|--------------|---------------|----------------------------|--------------|
|                       |              |               | <u>Lower</u>               | <u>Upper</u> |
| <b>Booster group</b>  | <b>0.000</b> | <b>0.12</b>   | <b>0.08</b>                | <b>0.18</b>  |
| age                   | 0.000        | 1.10          | 1.08                       | 1.12         |
| Socio-economic status | 0.486        | 0.97          | 0.90                       | 1.05         |
| DM                    | 0.475        | 1.14          | 0.80                       | 1.62         |
| COPD                  | 0.227        | 1.35          | 0.83                       | 2.18         |
| CVA                   | 0.033        | 1.57          | 1.04                       | 2.38         |
| CRF                   | 0.000        | 2.94          | 2.01                       | 4.30         |
| IHD                   | 0.607        | 0.90          | 0.62                       | 1.33         |
| CHF                   | 0.350        | 1.25          | 0.78                       | 2.02         |
| obesity               | 0.413        | 1.16          | 0.81                       | 1.68         |
| Smoking history       | 0.534        | 1.12          | 0.78                       | 1.61         |
| Lung cancer           | 0.002        | 3.64          | 1.58                       | 8.38         |
| TIA                   | 0.999        | 1.00          | 0.54                       | 1.86         |

Table S8: Results of the Cox regression analysis for infection- all subjects

|                       | Sig.  | Exp(B)      | 95.0% CI for Exp(B) |             |
|-----------------------|-------|-------------|---------------------|-------------|
|                       |       |             | Lower               | Upper       |
| <b>Booster group</b>  | 0.000 | <b>0.17</b> | <b>0.16</b>         | <b>0.18</b> |
| Sex (male)            | 0.000 | 1.16        | 1.12                | 1.20        |
| age                   | 0.000 | 0.99        | 0.98                | 0.99        |
| Socio-economic status | 0.000 | 0.98        | 0.97                | 0.98        |
| DM                    | 0.000 | 1.08        | 1.04                | 1.12        |
| COPD                  | 0.000 | 1.18        | 1.09                | 1.28        |
| CVA                   | 0.001 | 1.12        | 1.05                | 1.20        |
| CRF                   | 0.006 | 1.11        | 1.03                | 1.20        |
| IHD                   | 0.985 | 1.00        | 0.95                | 1.05        |
| CHF                   | 0.001 | 1.16        | 1.06                | 1.26        |
| obesity               | 0.000 | 1.09        | 1.06                | 1.14        |
| Smoking history       | 0.000 | 0.78        | 0.75                | 0.81        |
| Lung cancer           | 0.453 | 0.92        | 0.73                | 1.15        |
| TIA                   | 0.032 | 1.11        | 1.01                | 1.22        |

## References

1. Dagan N, Barda N, Kepten E, et al. BNT162b2 mRNA Covid-19 Vaccine in a Nationwide Mass Vaccination Setting. *N Engl J Med.* 2021;384(15):1412-1423. doi:10.1056/NEJMoa2101765.
2. Barda, N., Dagan, N., Ben-Shlomo, Y., Kepten, E., Waxman, J., Ohana, R., Hernán, M.A., Lipsitch, M., Kohane, I., Netzer, D. and Reis, B.Y., 2021. Safety of the BNT162b2 mRNA Covid-19 vaccine in a nationwide setting. *New England Journal of Medicine*, 385(12), pp.1078-1090.
3. Bar-On YM, Goldberg Y, Mandel M, et al. Protection of BNT162b2 Vaccine Booster against Covid-19 in Israel [published online ahead of print, 2021 Sep 15. *N Engl J Med.* 2021; NEJMoa2114255. doi:10.1056/NEJMoa2114255
4. Central Bureau of Statistics Israel. Characterization and classification of geographical units by the socio-economic level of the population 2008. Jerusalem, 2013.
5. Points location intelligence, 2021. <https://points.co.il/en/points-location-intelligence/>[Accessed Oct 3, 2021].
6. Weisband, Y.L., Kaufman-Shriqui, V., Sagy, Y.W., Krieger, M., Ahmad, W.A. and Manor, O., 2020. Area-level socio-economic disparity trends in nutritional status among 5–6-year-old children in Israel. *Archives of disease in childhood*, 105(11), pp.1049-1054.
